# Supplementary material
Source: HighWire-hosted journal article supplement (https://bmjopen.bmj.com/content/6/11/e011571)
Supplement: inline-supplementary-material-1 [file inline-supplementary-material-1.pdf]

Appendix 1- The studied health behaviors and health indicators among Brazilian adolescents – PeNSE 2012.

| VARIABLE    | ITEM                                                                                                                                                  | OPERATIONALIZATION                                                                                                                                                     |
|-------------|-------------------------------------------------------------------------------------------------------------------------------------------------------|------------------------------------------------------------------------------------------------------------------------------------------------------------------------|
| <b>Risk</b> |                                                                                                                                                       |                                                                                                                                                                        |
| Aggression  | Have you mocked, teased, called names or intimidated one of your schoolmates so much that he or she was hurt / annoyed / upset / offended. (last 30d) | 0) No; 1) Yes                                                                                                                                                          |
|             | Were you involved in a fight where a gun was used (last 30d)                                                                                          | 0) No; 1) Yes                                                                                                                                                          |
|             | Were you involved in a fight where a knife, a stone, a stick or a glass bottle was used? (last 30d)                                                   | 0) No; 1) Yes                                                                                                                                                          |
|             | How often you were involved in physical fight (last 12 months)                                                                                        | 0) I wasn't; 1) once; 2) 2-3 times; 3) 4-5; 4) 6-7; 5) 8-9; 6) 10-11; 7) 12 more.                                                                                      |
| Alcohol     | How often did you drink (last 30d)                                                                                                                    | 0) I didn't; 1) 1-2 days; 2) 3-5 d; 3) 6-9d; 4) 10-19 d; 5) 20-29 d; 6) everyday                                                                                       |
|             | How many glasses or doses of alcohol did you consume on a day you drank? (last 30d)                                                                   | 0) I didn't; 1) Less than one glass or dose; 2) 1 glass or 1 dose; 3) 2 glasses or 2 doses; 4) 3 glasses or 3 doses; 5) 4 glasses or 4 doses; 6) 5 glasses or 5 doses; |
| Smoking     | How many days did you smoke (last 30d)                                                                                                                | 0) I never did; 1) I didn't 1) 1-2d; 2) 3-5 d; 3) 6-9d; 4) 10-19d; 5) 20-29d; 6) everyday                                                                              |
| Drugs       | How often did you use drugs such as marijuana, cocaine, crack, glue, ecstasy, oxy, etc? (last 30d)                                                    | 0) I never did; 1) I didn't 1) 1-2d; 2) 3-5 d; 3) 6-9d; 4) 10 or more days.                                                                                            |
| Unsafe sex  | How many different people have you had sexual intercourse with                                                                                        | Category 0 "never" and then advancing one person per category from 1 "1 person" to 6 "6 people or more"                                                                |
|             | Last time you had sexual intercourse, you or your partner have used condom?                                                                           | 0) I never had or Yes; 1) No or I don't know.                                                                                                                          |
| Diet**      | How often have you eaten bagged salty snacks? (last week)                                                                                             | number of days (0-7)                                                                                                                                                   |
|             | How often have you eaten fried snacks? (last week)                                                                                                    | number of days (0-7)                                                                                                                                                   |
|             | How often have you drunk soft drinks? (last week)                                                                                                     | number of days (0-7)                                                                                                                                                   |

|                   |                                                                                                    |                                           |
|-------------------|----------------------------------------------------------------------------------------------------|-------------------------------------------|
| Sedentarism       | How many hours a day do you spent in sitting activities***                                         | From 0 "less then 1h" to 8 "more than 8h" |
| <b>Protective</b> |                                                                                                    |                                           |
| Diet**            | How often have you eaten raw vegetables? (last week)                                               | number of days (0-7)                      |
|                   | How often have you eaten cooked vegetables? (last week)                                            | number of days (0-7)                      |
|                   | How often have you eaten fruit? (last week)                                                        | number of days (0-7)                      |
| Physical activity | How many days have you done physical activity for at least 60 min or one hour per day? (last week) | number of days (0-7)                      |

\* it was defined as one can of beer, one glass of wine, a shot of cachaça or whiskey

\*\* in all diet questions were given country specific examples.

\*\*\*watching TV, using computers, playing video game, talking to friends and other activities apart from school.
