# Supplementary material
Source: HighWire-hosted journal article supplement (https://bmjopen.bmj.com/content/6/11/e011571)
Supplement: inline-supplementary-material-3 [file inline-supplementary-material-3.pdf]

Appendix 3 -Prevalence of risk and protective behaviors (%) among Brazilian adolescents. National Survey of Health among 9th Grade Students (PeNSE, 2012)

| Behaviors (%)                   | Gender | Operationalization |          |           |           |           |           |           |           |
|---------------------------------|--------|--------------------|----------|-----------|-----------|-----------|-----------|-----------|-----------|
| Food intake frequency           |        | none               | 1        | 2         | 3         | 4         | 5         | 6         | 7         |
|                                 |        |                    | day/week | days/week | days/week | days/week | days/week | days/week | days/week |
| Bagged salty snacks intake      | Male   | 26.5               | 20.9     | 18.1      | 13.8      | 6.7       | 4.5       | 2.4       | 7.3       |
|                                 | Female | 25.6               | 21.2     | 16.5      | 12.4      | 7.0       | 5.0       | 2.9       | 9.4       |
|                                 | Total  | 26.0               | 21.0     | 17.3      | 13.0      | 6.8       | 4.7       | 2.7       | 8.4       |
| Fried salty snacks intake       | Male   | 42.4               | 20.4     | 12.5      | 8.6       | 5.1       | 3.6       | 2.2       | 5.1       |
|                                 | Female | 37.2               | 20.1     | 13.3      | 9.0       | 5.5       | 4.6       | 3.4       | 7.0       |
|                                 | Total  | 39.7               | 20.3     | 12.9      | 8.8       | 5.3       | 4.1       | 2.8       | 6.1       |
| Fizzy drinks intake             | Male   | 12.2               | 14.1     | 15.5      | 14.3      | 10.3      | 8.4       | 5.7       | 19.5      |
|                                 | Female | 15.5               | 15.9     | 14.5      | 12.5      | 8.7       | 7.5       | 6.1       | 19.3      |
|                                 | Total  | 13.94              | 15.0     | 15.0      | 13.4      | 9.5       | 7.9       | 5.9       | 19.4      |
| Raw vegetables intake           | Male   | 30.2               | 15.0     | 12.0      | 10.2      | 7.0       | 6.0       | 4.2       | 15.4      |
|                                 | Female | 29.8               | 15.1     | 11.3      | 9.4       | 6.9       | 5.5       | 4.7       | 17.3      |
|                                 | Total  | 30.0               | 15.0     | 11.6      | 9.8       | 7.0       | 5.8       | 4.5       | 16.4      |
| Cooked vegetables intake        | Male   | 37.5               | 20.2     | 14.1      | 9.5       | 5.5       | 3.6       | 2.4       | 7.2       |
|                                 | Female | 37.7               | 20.4     | 13.6      | 9.2       | 5.7       | 3.8       | 2.8       | 7.2       |
|                                 | Total  | 37.4               | 20.3     | 13.9      | 9.3       | 5.6       | 3.7       | 2.6       | 7.2       |
| Fruit intake                    | Male   | 20.1               | 14.6     | 13.1      | 12.9      | 9.8       | 7.9       | 5.1       | 16.6      |
|                                 | Female | 22.4               | 14.7     | 12.8      | 11.0      | 8.3       | 7.0       | 5.4       | 18.4      |
|                                 | Total  | 21.3               | 14.7     | 13.0      | 11.9      | 9.0       | 7.4       | 5.3       | 17.6      |
| Physical activity               |        | none               | 1        | 2         | 3         | 4         | 5         | 6         | 7         |
|                                 |        |                    | day/week | days/week | days/week | days/week | days/week | days/week | days/week |
| Physical activity (at least 1h) | Male   | 14.4               | 18.0     | 16.3      | 14.2      | 9.2       | 7.8       | 4.2       | 15.9      |
|                                 | Female | 33.9               | 21.8     | 15.5      | 10.2      | 5.5       | 4.3       | 2.1       | 6.7       |

|                                                       |        |                    |             |             |             |             |               |     |      |
|-------------------------------------------------------|--------|--------------------|-------------|-------------|-------------|-------------|---------------|-----|------|
| <b>Sedentary Behavior</b><br>Hours sitting (weekdays) | Total  | 24.6               | 20.0        | 15.9        | 12.1        | 7.3         | 5.9           | 3.1 | 11.1 |
|                                                       |        | <b>&lt; 1 hour</b> | <b>1-2h</b> | <b>3-4h</b> | <b>5-6h</b> | <b>7-8h</b> | <b>&gt;8h</b> |     |      |
|                                                       | Male   | 16.9               | 23.9        | 25.3        | 15.3        | 6.6         | 12.1          |     |      |
|                                                       | Female | 15.4               | 19.9        | 23.1        | 17.5        | 8.9         | 15.2          |     |      |
|                                                       | Total  | 16.1               | 21.8        | 24.2        | 16.5        | 7.8         | 13.7          |     |      |

---
